# Supplementary material
Source: MDPI journal article supplement (https://www.mdpi.com/2077-0472/13/5/992)
Supplement: s1 [file s1]

Table S1. Mean values, homogenous groups and standard deviations (s.d.) for five quantitative traits in all studied genotypes of *Brassica napus*.

| DH lines | Silique length [mm] |                   |      | Silique width [mm] |                   |      | Number of seeds per silique |                    |      | Seed coat color |                   |      | TSW [g] |                   |      |
|----------|---------------------|-------------------|------|--------------------|-------------------|------|-----------------------------|--------------------|------|-----------------|-------------------|------|---------|-------------------|------|
|          | Mean                | Homogenous groups | s.d. | Mean               | Homogenous groups | s.d. | Mean                        | Homogenous groups  | s.d. | Mean            | Homogenous groups | s.d. | Mean    | Homogenous groups | s.d. |
| DH 01    | 52.10               | efghijklmnop      | 7.18 | 4.03               | abcd              | 0.03 | 18.88                       | a                  | 2.47 | 2.12            | ghijklmno         | 0.38 | 4.59    | efghijklmnopqr    | 0.53 |
| DH 02    | 56.31               | bcdefghijklm      | 2.28 | 3.68               | bcdefghij         | 0.29 | 16.19                       | abcdefghijklmno    | 1.24 | 0.27            | BCDEF             | 0.16 | 5.16    | cdefghijklmnopq   | 0.70 |
| DH 03    | 56.13               | bcdefghijklmn     | 1.85 | 3.93               | abcdef            | 0.08 | 17.77                       | abcdefghi          | 0.25 | 2.15            | ghijklmn          | 0.62 | 5.40    | abcdefghijklmn    | 0.33 |
| DH 04    | 52.20               | efghijklmno       | 4.27 | 3.59               | bcdefghijk        | 0.33 | 16.29                       | abcdefghijklmno    | 1.67 | 2.32            | fghijkl           | 0.21 | 4.28    | mnopqr            | 0.95 |
| DH 05    | 55.42               | bcdefghijklmno    | 3.40 | 3.12               | k                 | 0.21 | 17.60                       | abcdefghi          | 2.58 | 2.72            | defg              | 0.32 | 4.74    | efghijklmnopqr    | 0.64 |
| DH 06    | 53.07               | defghijklmno      | 6.32 | 3.47               | efghijk           | 0.31 | 14.32                       | efghijklmnopqrs    | 2.68 | 0.71            | uvwxyzABCDEFG     | 0.23 | 5.02    | defghijklmnopq    | 0.13 |
| DH 07    | 41.98               | q                 | 2.91 | 3.78               | abcdefghi         | 0.28 | 8.50                        | t                  | 4.23 | 3.63            | bc                | 0.78 | 4.69    | efghijklmnopqr    | 0.80 |
| DH 08    | 54.00               | bcdefghijklmno    | 8.35 | 3.72               | bcdefghi          | 0.25 | 12.93                       | mnopqrs            | 5.49 | 1.81            | ijklmnopqr        | 0.44 | 6.57    | a                 | 0.38 |
| DH 09    | 50.58               | hijklmnop         | 2.98 | 3.43               | fghijk            | 0.42 | 14.64                       | defghijklmnopqrs   | 0.67 | 1.02            | rstuvwxyzABCDE    | 0.48 | 4.66    | efghijklmnopqr    | 0.37 |
| DH 10    | 50.23               | ijklmnop          | 3.19 | 3.75               | abcdefghi         | 0.23 | 12.88                       | nopqrs             | 2.75 | 0.46            | yzABCDEFG         | 0.14 | 5.09    | cdefghijklmnopq   | 0.28 |
| DH 11    | 55.53               | bcdefghijklmno    | 3.80 | 3.57               | bcdefghijk        | 0.29 | 14.07                       | hijklmnopqrs       | 3.14 | 1.18            | pqrstuvwxy        | 0.86 | 5.20    | cdefghijklmnop    | 1.18 |
| DH 12    | 57.82               | bcdefghi          | 3.69 | 3.72               | bcdefghi          | 0.32 | 17.99                       | abcdefg            | 2.22 | 0.80            | tuvwxyzABCDEFG    | 0.26 | 5.46    | abcdefghijklm     | 0.54 |
| DH 13    | 60.83               | bc                | 9.32 | 3.65               | bcdefghijk        | 0.22 | 17.95                       | abcdefgh           | 3.37 | 0.91            | stuvwxyzABCDEFG   | 0.39 | 4.56    | fghijklmnopqr     | 0.51 |
| DH 14    | 54.15               | bcdefghijklmno    | 0.50 | 3.67               | bcdefghij         | 0.24 | 16.92                       | abcdefghijkl       | 0.88 | 2.57            | efghi             | 0.65 | 4.94    | efghijklmnopq     | 0.34 |
| DH 15    | 50.92               | hijklmnop         | 2.55 | 3.93               | abcdef            | 0.23 | 18.22                       | abcde              | 0.94 | 0.54            | xyzABCDEFG        | 0.27 | 4.44    | hijklmnopqr       | 0.98 |
| DH 16    | 54.08               | bcdefghijklmno    | 1.95 | 3.51               | defghijk          | 0.30 | 16.49                       | bcdefghijklmno     | 0.84 | 1.35            | nopqrstuvw        | 1.06 | 4.70    | efghijklmnopqr    | 0.76 |
| DH 17    | 58.73               | bcdefg            | 4.00 | 3.47               | efghijk           | 0.44 | 18.72                       | ab                 | 3.44 | 1.79            | ijklmnopqr        | 0.06 | 5.03    | defghijklmnopq    | 0.75 |
| DH 18    | 54.73               | bcdefghijklmno    | 3.45 | 3.75               | abcdefghi         | 0.13 | 15.42                       | abcdefghijklmnopq  | 3.53 | 0.52            | xyzABCDEFG        | 0.25 | 5.02    | defghijklmnopq    | 0.39 |
| DH 19    | 51.15               | ghijklmnop        | 1.99 | 3.78               | abcdefghi         | 0.23 | 17.62                       | abcdefghi          | 3.37 | 2.49            | efghij            | 0.55 | 5.11    | cdefghijklmnopq   | 0.21 |
| DH 20    | 57.42               | bcdefghijk        | 4.45 | 3.38               | ghijk             | 0.21 | 15.08                       | bcdefghijklmnopqrs | 1.48 | 0.18            | EF                | 0.09 | 5.62    | abcdefgh          | 0.48 |
| DH 21    | 59.40               | bcdef             | 1.91 | 3.67               | bcdefghij         | 0.25 | 17.43                       | bcdefghij          | 0.90 | 2.63            | efghi             | 0.38 | 4.74    | efghijklmnopqr    | 0.47 |
| DH 22    | 57.12               | bcdefghijklm      | 4.83 | 3.48               | efghijk           | 0.45 | 18.47                       | abcd               | 4.40 | 3.11            | cdef              | 0.30 | 4.82    | efghijklmnopqr    | 0.66 |
| DH 23    | 55.81               | bcdefghijklmno    | 7.22 | 3.55               | cdefghijk         | 0.48 | 15.34                       | abcdefghijklmnopqr | 2.39 | 0.25            | CDEF              | 0.13 | 4.96    | efghijklmnopq     | 0.40 |
| DH 24    | 54.20               | bcdefghijklmno    | 4.34 | 4.05               | abc               | 0.05 | 16.55                       | bcdefghijklmno     | 2.88 | 0.43            | zABCDEFG          | 0.18 | 5.63    | abcdefgh          | 1.19 |
| DH 25    | 52.87               | efghijklmno       | 3.22 | 3.62               | bcdefghijk        | 0.40 | 14.15                       | ghijklmnopqrs      | 1.91 | 1.09            | qrstuvwxyABCD     | 0.08 | 4.30    | lmnopqr           | 0.93 |
| DH 26    | 60.67               | bcd               | 0.62 | 3.73               | abcdefghi         | 0.44 | 16.83                       | bcdefghijklm       | 1.51 | 0.10            | F                 | 0.07 | 5.69    | abcdefg           | 0.56 |
| DH 27    | 52.33               | efghijklmno       | 4.38 | 3.82               | abcdefgh          | 0.28 | 16.97                       | abcdefghijkl       | 1.91 | 2.66            | efgh              | 0.92 | 5.36    | bcdefghijklmno    | 0.35 |
| DH 28    | 50.16               | ijklmnop          | 7.06 | 3.39               | ghijk             | 0.29 | 15.25                       | bcdefghijklmnopqr  | 4.39 | 1.45            | mnopqrstuvw       | 0.14 | 4.67    | efghijklmnopqr    | 1.16 |
| DH 29    | 49.82               | klmnop            | 2.63 | 4.00               | abcde             | 0.05 | 15.33                       | bcdefghijklmnopqr  | 0.75 | 2.32            | fghijkl           | 0.32 | 4.48    | hijklmnopqr       | 0.35 |

|       |       |                |       |      |            |      |       |                    |      |      |               |      |      |                 |      |
|-------|-------|----------------|-------|------|------------|------|-------|--------------------|------|------|---------------|------|------|-----------------|------|
| DH 30 | 51.05 | ghijklmnop     | 3.03  | 4.26 | a          | 1.29 | 13.94 | ijklmnopqrs        | 2.91 | 1.54 | lmnopqrstu    | 0.41 | 6.43 | ab              | 0.55 |
| DH 31 | 59.52 | bcde           | 2.31  | 3.72 | bcdefghi   | 0.40 | 17.03 | bcdefghijkl        | 0.42 | 0.25 | DEF           | 0.12 | 5.52 | bcdefghijk      | 0.91 |
| DH 32 | 51.28 | ghijklmnop     | 0.87  | 3.69 | bcdefghi   | 0.35 | 16.92 | bcdefghijkl        | 0.95 | 2.21 | ghijklm       | 0.57 | 5.11 | cdefghijklmnopq | 1.24 |
| DH 33 | 54.88 | bcdefghijklmno | 2.06  | 3.68 | bcdefghij  | 0.24 | 13.65 | ijklmnopqrs        | 1.31 | 2.41 | efghijk       | 1.58 | 4.57 | efghijklmnopqr  | 0.54 |
| DH 34 | 48.58 | nopq           | 4.54  | 3.93 | abcdef     | 0.13 | 12.02 | pqrst              | 2.59 | 1.10 | qrstuvwxyzaB  | 0.39 | 5.02 | defghijklmnopq  | 0.80 |
| DH 35 | 53.65 | bcdefghijklmno | 1.01  | 3.65 | bcdefghijk | 0.16 | 15.64 | bcdefghijklmnopq   | 0.34 | 1.34 | nopqrstuvwxyz | 0.34 | 5.01 | defghijklmnopq  | 0.98 |
| DH 36 | 51.72 | fghijklmnop    | 5.97  | 3.76 | bcdefghi   | 0.21 | 18.17 | abcdef             | 3.94 | 4.23 | ab            | 0.39 | 4.96 | efghijklmnopq   | 0.49 |
| DH 37 | 53.72 | bcdefghijklmno | 10.77 | 3.72 | bcdefghi   | 0.20 | 15.87 | bcdefghijklmnopq   | 4.24 | 2.32 | fghijkl       | 0.37 | 5.00 | efghijklmnopq   | 0.58 |
| DH 38 | 53.64 | bcdefghijklmno | 1.25  | 3.78 | bcdefghi   | 0.21 | 17.37 | bcdefghij          | 1.52 | 3.23 | cde           | 0.36 | 3.98 | qr              | 0.28 |
| DH 39 | 52.39 | efghijklmno    | 1.69  | 3.71 | bcdefghi   | 0.25 | 16.21 | bcdefghijklmno     | 0.67 | 3.18 | cde           | 0.94 | 4.38 | ijklmnopqr      | 0.88 |
| DH 40 | 53.05 | defghijklmno   | 6.67  | 3.57 | bcdefghijk | 0.62 | 12.00 | qrst               | 1.55 | 0.65 | wxyzABCDEFG   | 0.77 | 5.40 | bcdefghijklmn   | 0.81 |
| DH 41 | 49.58 | lmnopq         | 2.40  | 3.92 | abcdefg    | 0.08 | 13.43 | klmnopqrs          | 0.88 | 0.84 | tvwxyzABCDEFG | 0.57 | 5.32 | bcdefghijklmno  | 1.09 |
| DH 42 | 44.41 | pq             | 6.39  | 3.44 | fghijk     | 0.25 | 11.47 | rst                | 1.27 | 2.57 | efghi         | 1.13 | 4.48 | hijklmnopqr     | 0.32 |
| DH 43 | 56.65 | bcdefghijklm   | 9.68  | 3.66 | bcdefghij  | 0.32 | 14.69 | defghijklmnopqrs   | 3.42 | 1.57 | klmnopqrst    | 0.24 | 5.61 | bcdefgh         | 0.44 |
| DH 44 | 51.82 | efghijklmnop   | 4.83  | 3.46 | fghijk     | 0.42 | 13.87 | ijklmnopqrs        | 2.51 | 1.30 | opqrstuvwxyz  | 0.96 | 5.09 | cdefghijklmnopq | 0.97 |
| DH 45 | 52.53 | efghijklmno    | 2.00  | 3.59 | bcdefghijk | 0.23 | 14.14 | ghijklmnopqrs      | 1.65 | 1.09 | qrstuvwxyzaBC | 0.33 | 4.80 | efghijklmnopqr  | 0.55 |
| DH 46 | 55.50 | bcdefghijklmno | 2.25  | 3.82 | bcdefgh    | 0.38 | 16.35 | bcdefghijklmno     | 0.60 | 0.55 | xyzABCDEFG    | 0.16 | 6.20 | abcd            | 1.74 |
| DH 47 | 53.07 | defghijklmno   | 7.48  | 3.15 | jk         | 0.33 | 13.28 | lmnopqrs           | 3.23 | 2.56 | efghi         | 0.91 | 4.72 | efghijklmnopqr  | 0.16 |
| DH 48 | 55.10 | bcdefghijklmno | 4.99  | 3.56 | cdefghijk  | 0.23 | 14.82 | bcdefghijklmnopqrs | 2.64 | 0.28 | ABCDEFG       | 0.06 | 4.36 | klmnopqr        | 0.57 |
| DH 49 | 57.23 | bcdefghijkl    | 1.71  | 3.78 | bcdefghi   | 0.26 | 16.92 | bcdefghijkl        | 1.37 | 1.92 | ghijklmnopq   | 0.18 | 5.12 | cdefghijklmnopq | 0.94 |
| DH 50 | 54.49 | bcdefghijklmno | 0.45  | 3.69 | bcdefghi   | 0.23 | 16.74 | bcdefghijklmn      | 1.61 | 1.97 | ghijklmnop    | 0.58 | 5.12 | cdefghijklmnopq | 0.13 |
| DH 51 | 53.87 | bcdefghijklmno | 2.59  | 3.69 | bcdefghi   | 0.15 | 13.55 | ijklmnopqrs        | 2.27 | 0.27 | BCDEF         | 0.19 | 6.26 | abc             | 2.02 |
| DH 52 | 54.22 | bcdefghijklmno | 4.85  | 3.41 | fghijk     | 0.32 | 14.52 | efghijklmnopqrs    | 1.77 | 0.35 | zABCDEFG      | 0.21 | 4.21 | nopqr           | 0.99 |
| DH 53 | 54.33 | bcdefghijklmno | 1.93  | 3.81 | bcdefghi   | 0.25 | 17.37 | bcdefghij          | 1.37 | 1.71 | ijklmnopqrs   | 0.86 | 5.03 | defghijklmnopq  | 0.82 |
| DH 54 | 49.82 | klmnop         | 4.40  | 3.47 | efghijk    | 0.33 | 12.80 | opqrs              | 1.79 | 0.72 | uvwxyzABCDEFG | 0.14 | 4.09 | pqr             | 0.74 |
| DH 55 | 50.58 | hijklmnop      | 10.04 | 3.29 | hijk       | 0.38 | 14.92 | bcdefghijklmnopqrs | 4.39 | 0.46 | yzABCDEFG     | 0.53 | 4.49 | hijklmnopqr     | 0.91 |
| DH 56 | 51.12 | ghijklmnop     | 2.73  | 3.55 | cdefghijk  | 0.48 | 16.20 | bcdefghijklmno     | 3.59 | 1.14 | pqrstuvwxyz   | 0.58 | 4.28 | mnopqr          | 0.62 |
| DH 57 | 57.63 | bcdefghij      | 1.15  | 3.73 | bcdefghi   | 0.50 | 15.92 | bcdefghijklmnop    | 1.01 | 3.54 | bcd           | 0.93 | 5.58 | bcdefghi        | 0.62 |
| DH 58 | 53.28 | cdefghijklmno  | 4.04  | 3.32 | hijk       | 0.33 | 12.92 | mnopqrs            | 0.98 | 1.11 | qrstuvwxyza   | 0.44 | 4.79 | efghijklmnopqr  | 0.67 |
| DH 59 | 61.27 | b              | 2.82  | 3.33 | hijk       | 0.20 | 16.60 | bcdefghijklmno     | 1.96 | 0.58 | xyzABCDEFG    | 0.47 | 5.13 | cdefghijklmnopq | 0.47 |
| DH 60 | 55.20 | bcdefghijklmno | 2.10  | 3.48 | efghijk    | 0.29 | 17.22 | bcdefghijk         | 2.45 | 1.61 | klmnopqrst    | 0.23 | 5.17 | cdefghijklmnopq | 0.38 |
| DH 61 | 56.02 | bcdefghijklmn  | 2.17  | 3.66 | bcdefghij  | 0.35 | 15.32 | bcdefghijklmnopqr  | 0.56 | 0.70 | vwxyzABCDEFG  | 0.10 | 5.76 | abcde           | 0.14 |
| DH 62 | 56.05 | bcdefghijklmn  | 4.19  | 3.66 | bcdefghij  | 0.30 | 14.89 | bcdefghijklmnopqrs | 2.48 | 0.81 | tvwxyzABCDEFG | 0.21 | 4.80 | efghijklmnopqr  | 0.40 |
| DH 63 | 48.22 | opq            | 4.02  | 3.70 | bcdefghi   | 0.20 | 11.22 | st                 | 2.59 | 1.85 | hijklmnopqr   | 0.36 | 5.28 | bcdefghijklmnop | 1.40 |

|                           |       |                |       |      |            |      |       |                   |      |      |               |      |      |                 |      |
|---------------------------|-------|----------------|-------|------|------------|------|-------|-------------------|------|------|---------------|------|------|-----------------|------|
| <b>DH 64</b>              | 55.63 | bcdefghijklmno | 1.74  | 3.64 | bcdefghijk | 0.12 | 13.89 | ijklmnopqrs       | 2.37 | 1.07 | rstuvwxyzABCD | 0.67 | 5.06 | defghijklmnopq  | 1.01 |
| <b>DH 65</b>              | 53.67 | bcdefghijklmno | 5.45  | 3.46 | fghijk     | 0.39 | 16.33 | bcdefghijklmno    | 2.07 | 0.47 | yzABCDEF      | 0.32 | 4.41 | ijklmnopqr      | 0.17 |
| <b>DH 66</b>              | 54.42 | bcdefghijklmno | 3.05  | 3.48 | efghijk    | 0.24 | 15.80 | bcdefghijklmnopq  | 2.94 | 2.03 | ghijklmno     | 0.41 | 4.77 | efghijklmnopqr  | 1.09 |
| <b>DH 67</b>              | 50.03 | ijklmnop       | 2.89  | 3.77 | bcdefgh    | 0.03 | 15.35 | bcdefghijklmnopqr | 2.36 | 0.55 | xyzABCDEF     | 0.09 | 4.59 | efghijklmnopqr  | 0.35 |
| <b>DH 68</b>              | 50.65 | hijklmnop      | 7.66  | 3.65 | bcdefghijk | 0.20 | 14.28 | fghijklmnopqrs    | 3.00 | 1.17 | pqrstuvwxyz   | 0.15 | 4.79 | efghijklmnopqr  | 0.37 |
| <b>DH 69</b>              | 69.63 | a              | 14.89 | 3.48 | efghijk    | 0.40 | 17.75 | bcdefgh           | 3.39 | 0.27 | BCDEF         | 0.07 | 5.52 | bcdefghijk      | 0.42 |
| <b>DH 70</b>              | 50.63 | hijklmnop      | 6.30  | 3.32 | hijk       | 0.60 | 14.62 | defghijklmnopqrs  | 1.34 | 1.52 | lmnopqrstuv   | 1.31 | 4.17 | opqr            | 0.51 |
| <b>DH 71</b>              | 50.70 | hijklmnop      | 4.62  | 3.55 | cdefghijk  | 0.27 | 14.30 | fghijklmnopqrs    | 2.32 | 4.36 | ab            | 0.35 | 5.49 | bcdefghijkl     | 1.00 |
| <b>DH 72</b>              | 48.42 | nopq           | 4.56  | 3.70 | bcdefgh    | 0.18 | 13.97 | ijklmnopqrs       | 1.85 | 2.48 | efghij        | 0.51 | 5.74 | abcdef          | 0.07 |
| <b>DH 73</b>              | 55.12 | bcdefghijklmno | 4.59  | 4.05 | abc        | 0.09 | 15.32 | bcdefghijklmnopqr | 1.81 | 2.75 | defg          | 0.36 | 5.56 | bcdefghij       | 0.77 |
| <b>DH 74</b>              | 52.90 | efghijklmno    | 4.08  | 3.82 | bcdefgh    | 0.10 | 15.20 | bcdefghijklmnopqr | 3.04 | 0.64 | wxyzABCDEF    | 0.17 | 5.54 | bcdefghijk      | 0.25 |
| <b>DH 75</b>              | 50.95 | hijklmnop      | 2.78  | 4.10 | ab         | 0.23 | 16.83 | bcdefghijklm      | 0.89 | 0.52 | xyzABCDEF     | 0.37 | 5.59 | bcdefgh         | 0.07 |
| <b>DH 76</b>              | 49.73 | klmnop         | 2.41  | 3.57 | bcdefghijk | 0.46 | 13.23 | lmnopqrs          | 2.35 | 0.70 | vwxxyzABCDEF  | 0.42 | 4.51 | ghijklmnopqr    | 0.80 |
| <b>DH 77</b>              | 49.42 | mnopq          | 5.99  | 3.27 | ijk        | 0.28 | 14.76 | cdefghijklmnopqrs | 2.67 | 1.50 | lmnopqrstuv   | 0.04 | 3.72 | r               | 0.57 |
| <b>DH 78</b>              | 57.75 | bcdefgh        | 3.60  | 3.82 | bcdefgh    | 0.26 | 18.62 | abc               | 2.78 | 1.13 | pqrstuvwxyz   | 0.44 | 5.24 | bcdefghijklmnop | 0.84 |
| <b>M 305</b>              | 58.24 | bcdefgh        | 1.38  | 3.64 | bcdefghijk | 0.22 | 16.13 | bcdefghijklmno    | 0.76 | 0.40 | zABCDEF       | 0.11 | 5.52 | bcdefghijk      | 0.14 |
| <b>Z 114</b>              | 49.76 | klmnop         | 0.59  | 3.63 | bcdefghijk | 0.31 | 15.66 | bcdefghijklmnopq  | 0.58 | 4.75 | a             | 0.41 | 4.85 | efghijklmnopqr  | 0.51 |
| <b>Mean</b>               | 53.66 |                | 3.88  | 3.65 |            | 0.29 | 15.44 |                   | 2.15 | 1.52 |               | 0.42 | 5.01 |                 | 0.64 |
| <b>LSD<sub>0.05</sub></b> | 7.72  |                |       | 0.53 |            |      | 3.92  |                   |      | 0.84 |               |      | 1.19 |                 |      |
